# Supplementary material for: Jagged1-mediated Notch activation induces epithelial-to-mesenchymal transition through Slug-induced repression of E-cadherin
Source: PubMed Central journal article supplement — J Exp Med. 2007 Nov 26;204(12):2935–48. doi: 10.1084/jem.20071082 (PMC2118507; doi:10.1084/jem.20071082), 2007-11-26
Supplement: jexpmed_jem.20071082_7.pdf [file jexpmed_jem.20071082_7.pdf]

Leong et al., <http://www.jem.org/cgi/content/full/jem.20071082/DC1>

## SUPPLEMENTAL MATERIALS AND METHODS

**Immunoblotting.** Concentrated supernatant from cultured cells was obtained by filtering 3-d-conditioned medium through a 100,000-kD cutoff ultrafiltration membrane (Millipore).

**Flow cytometry.** MCF-10A cell lines were detached by incubation in PBS-based enzyme-free cell dissociation buffer (Invitrogen). Cells were stained with mouse monoclonal antibody to surface E-cadherin (Chemicon), followed by goat anti-mouse Alexa Fluor 594 (Invitrogen) secondary antibody. Samples were run on a flow cytometer (EPICS ELITE-ESP; Beckman Coulter), and data were analyzed with WinList software (Verity Software House Inc.).

**Methylation assays.** For global genomic DNA methylation analysis, 500 ng of genomic DNA was digested with the restriction enzymes HpaII, MspI, or McrBC (all obtained from New England Biolabs, Inc.). HpaII is unable to digest CpG-methylated DNA, whereas its isoschizomer MspI is not sensitive to CpG methylation and, thus, is a positive control for DNA digestion. McrBC digests CpG-methylated DNA only in the presence of GTP. For McrBC digestion, reactions were performed with GTP (McrBC-plus-GTP) or without GTP (McrBC-minus-GTP). Entire reaction mixtures were assessed in 2% TAE-agarose gels containing ethidium bromide. For HpaII and McrBC-plus-GTP reactions, digested DNA products above 6 kb were quantitated by densitometry. For control and McrBC-minus-GTP reactions, undigested DNA products corresponding to the topmost DNA band were quantitated by densitometry. Data are expressed as a ratio of digested over undigested DNA products (digested/undigested ratio) and represent the mean ratio + SEM from five control tumors and five XNotch4 tumors.

**Immunostaining.** 7- $\mu$ m-thick tumor cryosections were stained with hematoxylin and eosin, rabbit polyclonal antibody to HA (BAbCo), and rat monoclonal antibody to mouse CD31 (BD Biosciences). For quantitation of the percentage of CD31-stained area, at least six random fields at 200 $\times$  magnification were analyzed per tumor using Northern Eclipse software. Vascular density was quantitated by expressing the CD31-stained area as a percentage of the total tumor area. For quantitation of the number of vessels per square millimeter, entire tumor sections were analyzed using Northern Eclipse software. Data are expressed as the mean percentage of CD31-stained area + SEM from 14 control tumors and 12 XNotch4 tumors, and the mean number of vessels per square millimeter + SEM from 13 control tumors and 16 XNotch4 tumors.

## REFERENCES

- Nosedá, M., L. Chang, G. McLean, J.E. Grim, B.E. Clurman, L.L. Smith, and A. Karsan. 2004. Notch activation induces endothelial cell cycle arrest and participates in contact inhibition: role of p21Cip1 repression. *Mol. Cell Biol.* 24:8813–8822.
- Nosedá, M., G. McLean, K. Niessen, L. Chang, I. Pollet, R. Montpetit, R. Shahidi, K. Dorovini-Zis, L. Li, B. Beckstead, R.E. Durand, P.A. Hoodless, and A. Karsan. 2004. Notch activation results in phenotypic and functional changes consistent with endothelial-to-mesenchymal transformation. *Circ. Res.* 94:910–917.
- Shou, J., S. Ross, H. Koeppen, F.J. de Sauvage, and W.Q. Gao. 2001. Dynamics of notch expression during murine prostate development and tumorigenesis. *Cancer Res.* 61:7291–7297.
- Muller, P., S. Kietz, J.A. Gustafsson, and A. Strom. 2002. The anti-estrogenic effect of all-trans-retinoic acid on the breast cancer cell line MCF-7 is dependent on HES-1 expression. *J. Biol. Chem.* 277:28376–28379.
- MacKenzie, F., P. Duriez, B. Larrivee, L. Chang, I. Pollet, F. Wong, C. Yip, and A. Karsan. 2004. Notch4-induced inhibition of endothelial sprouting requires the ankyrin repeats and involves signaling through RBP-Jkappa. *Blood.* 104:1760–1768.
- Fujita, N., D.L. Jaye, M. Kajita, C. Geigerman, C.S. Moreno, and P.A. Wade. 2003. MTA3, a Mi-2/NuRD complex subunit, regulates an invasive growth pathway in breast cancer. *Cell.* 113:207–219.
- Herman, J.G., J.R. Graff, S. Myohanen, B.D. Nelkin, and S.B. Baylin. 1996. Methylation-specific PCR: a novel PCR assay for methylation status of CpG islands. *Proc. Natl. Acad. Sci. USA.* 93:9821–9826.
- Graff, J.R., E. Gabrielson, H. Fujii, S.B. Baylin, and J.G. Herman. 2000. Methylation patterns of the E-cadherin 5' CpG island are unstable and reflect the dynamic, heterogeneous loss of E-cadherin expression during metastatic progression. *J. Biol. Chem.* 275:2727–2732.
- Okubo, T., T.K. Truong, B. Yu, T. Itoh, J. Zhao, B. Grube, D. Zhou, and S. Chen. 2001. Down-regulation of promoter 1.3 activity of the human aromatase gene in breast tissue by zinc-finger protein, snail (Snai1). *Cancer Res.* 61:1338–1346.
- van Doorn, R., R. Dijkman, M.H. Vermeer, J.J. Out-Luiting, E.M. van der Raaij-Helmer, R. Willemze, and C.P. Tensen. 2004. Aberrant expression of the tyrosine kinase receptor EphA4 and the transcription factor twist in Sezary syndrome identified by gene expression analysis. *Cancer Res.* 64:5578–5586.
- Decary, S., J.T. Decesse, V. Ogryzko, J.C. Reed, I. Naguibneva, A. Harel-Bellan, and C.E. Cremsi. 2002. The retinoblastoma protein binds the promoter of the survival gene bcl-2 and regulates its transcription in epithelial cells through transcription factor AP-2. *Mol. Cell Biol.* 22:7877–7888.
- Liu, L., M. Zeng, and J.S. Stampler. 1999. Hemoglobin induction in mouse macrophages. *Proc. Natl. Acad. Sci. USA.* 96:6643–6647.
- MacKenzie, F., P. Duriez, F. Wong, M. Nosedá, and A. Karsan. 2004. Notch4 inhibits endothelial apoptosis via RBP-Jkappa-dependent and -independent pathways. *J. Biol. Chem.* 279:11657–11663.

**Table S1.** PCR primer sequences

| Gene        | Primer identifier <sup>a</sup> | Species specificity |       | Primer sequences (5' to 3')          | Reference  |
|-------------|--------------------------------|---------------------|-------|--------------------------------------|------------|
|             |                                | Human               | Mouse |                                      |            |
| Jagged1     | A                              | X                   |       | Forward: CTATGATGAGGGGATGCT          | 1          |
|             | B                              |                     | X     | Forward: AATGGAGACTCCTTCACCTGT       | 2          |
|             | C                              | X                   | X     | Reverse: CGTCCATTACGGCACTGG          | 2          |
| Jagged2     | A                              | X                   |       | Forward: TGGGATGCCTGGCACA            | This study |
|             | B                              |                     | X     | Forward: CAGGGCACGCGGTGT             | This study |
|             | C                              | X                   | X     | Reverse: CCGGCAGATGCAGGA             | This study |
| Delta-like1 | A                              | X                   |       | Forward: GAGGGAGGCCTCGTGA            | This study |
|             | B                              |                     | X     | Forward: TGGTCTCTCAGAGTTAGCAGAG      | This study |
| Delta-like3 | C                              | X                   | X     | Reverse: AGACCCGAAGTGCCTTTGTA        | This study |
|             | A                              | X                   | X     | Forward: CGGATGCACTCAACAACCT         | This study |
|             | B                              | X                   |       | Reverse: GAAGATGGCAGGTAGCTCAA        | This study |
| Delta-like4 | C                              |                     | X     | Reverse: ATAGATGTCTCTGGGAGATGA       | This study |
|             | A                              | X                   | X     | Forward: GCATTGTTACATTGCATCCTG       | This study |
|             | B                              | X                   |       | Reverse: GCAAACCCAGCAAGAGAC          | This study |
| Notch1      | C                              |                     | X     | Reverse: GTAGCTCTGCTTAATGCCAAA       | This study |
|             | A                              | X                   |       | Forward: CACTGTGGGCGGTCC             | 3          |
|             | B                              | X                   |       | Reverse: GTTGATTGGTTCGGCACCAT        | 3          |
| Notch2      | C                              |                     | X     | Forward: GGCCACCTCTCACTGCTC          | 2          |
|             | D                              | X                   | X     | Reverse: CCGGAACCTCTGGTCTCCA         | 2          |
|             | A                              | X                   |       | Forward: AATCCCTGACTCCAGAACG         | This study |
| Notch3      | B                              |                     | X     | Forward: AACTGGAGAGTCCAAGAAACG       | 2          |
|             | C                              | X                   | X     | Reverse: TGGTAGACCAAGTCTGTATGAT      | 2          |
|             | A                              | X                   |       | Forward: TGAGACGCTCGTCACTTCTT        | 1          |
| Notch4      | B                              |                     | X     | Forward: CACCTGGCCCCCTAAG            | 2          |
|             | C                              | X                   | X     | Reverse: TGGAATGCAGTGAAGTGAGG        | 2          |
|             | A                              | X                   |       | Forward: TAGGGCTCCCCAGCTCTC          | 1          |
| HES1        | B                              |                     | X     | Forward: CAAGCTCCCGTAGTCTACTTC       | 2          |
|             | C                              | X                   | X     | Reverse: GGCAGGTGCCCCATT             | 2          |
|             | A                              | X                   |       | Forward: AGGCGGACATTCTGGAAATG        | 4          |
| HEY1        | B                              | X                   |       | Reverse: CGGTACTTCCCCAGCACTT         | 4          |
|             | A                              | X                   |       | Forward: GGAGAGGCGCCGCTGTAGTTA       | 5          |
|             | B                              | X                   |       | Reverse: CAAGGGCGTGCGCTCAAAGTA       | 5          |
| HEY2        | C                              | X                   | X     | Forward: GAGAAGCAGGGATCTGCTAA        | This study |
|             | D                              | X                   | X     | Reverse: CCCAAACTCCGATAGTCCAT        | This study |
|             | A                              | X                   | X     | Forward: ACAGGGGGTAAAGGCTACTTTG      | This study |
| HEYL        | B                              | X                   |       | Reverse: CTGCTGCTGCTGCGTTT           | This study |
|             | C                              | X                   | X     | Reverse: GAAGGACAGAGGGAAGCTGTGTG     | 5          |
|             | A                              | X                   | X     | Forward: TCCCACTGCCTTTGAG            | This study |
| E-cadherin  | B                              | X                   |       | Reverse: CTGCTGGGGGCGACA             | This study |
|             | C                              | X                   | X     | Reverse: GGCACCTCTCCAGGAT            | This study |
|             | A                              | X                   |       | Forward: CAGCACGTACACAGCCCTAA        | 6          |
|             | B                              | X                   |       | Reverse: ACCTGAGGCTTTGGATTCTT        | 6          |
|             | C                              | X                   |       | Forward: TTAGGTTAGAGGTTATCGCGT       | 7          |
|             | D                              | X                   |       | Reverse: TAACTAAAAATCACCTACCGAC      | 7          |
|             | E                              | X                   |       | Forward: TAATTTTAGGTTAGAGGGTATTGT    | 7          |
|             | F                              | X                   |       | Reverse: CACAACCAATCAACAACACA        | 7          |
| Slug        | G                              | X                   |       | Forward: GTTAGTTTTGGGGAGGGTT         | 8          |
|             | H                              | X                   |       | Reverse: ACTACTACTCCAAAAACCCATAACTAA | 8          |
|             | A                              | X                   |       | Forward: AGATGCATATTCGGACCCAC        | 6          |
| Snail       | B                              | X                   |       | Reverse: CCTCATGTTTGTGCAGGAGA        | 6          |
|             | A                              | X                   |       | Forward: AATCGGAAGCCTAACTACAGCGAG    | 9          |
| SIP1        | B                              | X                   |       | Reverse: CCTTGGCCTCAGAGAGCTGG        | 9          |
|             | A                              | X                   |       | Forward: ACACCCCTGGCACAACAA          | This study |
| Twist1      | B                              | X                   |       | Reverse: GTGTCACTGCGCTGAAGGTA        | This study |
|             | A                              | X                   |       | Forward: CACTGAAAGGAAAGGCATCA        | 10         |
| GAPDH       | B                              | X                   |       | Reverse: GGCCAGTTTGATCCCAGTAT        | 10         |
|             | A                              | X                   |       | Forward: GGACCTGACCTGCCGTCTAGAA      | 11         |
|             | B                              | X                   |       | Reverse: GGTGTCGCTGTTGAAGTCAGAG      | 11         |
|             | C                              |                     | X     | Forward: AATGTGTCGCTCGTGGATCT        | 12         |
|             | D                              |                     | X     | Reverse: CCCTGTTGCTGTAGCCGTAT        | 12         |
|             | E                              | X                   | X     | Forward: CCCATCACCATCTCCAG           | 13         |
|             | F                              | X                   | X     | Reverse: ATGACCTTGCCACAGCC           | 13         |

<sup>a</sup>The primer identifier is a letter assigned to each individual primer. Various combinations of two primers (Table S2, Primer set) are used to amplify the target gene of interest.

**Table S2.** PCR primer sets and conditions

| Gene                                 | Primer set <sup>a</sup> | Annealing temperature (°C) | Product size (bp) |
|--------------------------------------|-------------------------|----------------------------|-------------------|
| Human Jagged1                        | A/C                     | 53                         | 507               |
| Mouse Jagged1                        | B/C                     | 53                         | 383               |
| Human Jagged2                        | A/C                     | 53                         | 550               |
| Mouse Jagged2                        | B/C                     | 58                         | 550               |
| Human Delta-like1                    | A/C                     | 55                         | 448               |
| Mouse Delta-like1                    | B/C                     | 55                         | 410               |
| Human Delta-like3                    | A/B                     | 55                         | 338               |
| Mouse Delta-like3                    | A/C                     | 55                         | 329               |
| Human Delta-like4                    | A/B                     | 60                         | 456               |
| Mouse Delta-like4                    | A/C                     | 55                         | 473               |
| Human Notch1                         | A/B                     | 55                         | 85                |
| Mouse Notch1                         | C/D                     | 60                         | 529               |
| Human Notch2                         | A/C                     | 53                         | 589               |
| Mouse Notch2                         | B/C                     | 53                         | 583               |
| Human Notch3                         | A/C                     | 53                         | 667               |
| Mouse Notch3                         | B/C                     | 60                         | 449               |
| Human Notch4                         | A/C                     | 60                         | 486               |
| Mouse Notch4                         | B/C                     | 53                         | 486               |
| Human CSL                            | A/B                     | 57                         | 123               |
| Human HES1                           | A/B                     | 55                         | 103               |
| Human HEY1                           | A/B                     | 57                         | 428               |
| Human and mouse HEY1                 | C/D                     | 53                         | 137               |
| Human HEY2                           | A/B                     | 57                         | 574               |
| Human and mouse HEY2                 | A/C                     | 53                         | 531               |
| Human HEYL                           | A/B                     | 53                         | 583               |
| Human and mouse HEYL                 | A/C                     | 53                         | 391               |
| Human E-cadherin                     | A/B                     | 53                         | 159               |
| Human E-cadherin-M                   | C/D                     | 57                         | 116               |
| Human E-cadherin U                   | E/F                     | 53                         | 97                |
| Human E-cadherin-promoter sequencing | G/H                     | 50                         | 270               |
| Human Slug                           | A/B                     | 53                         | 258               |
| Human Snail                          | A/B                     | 50                         | 400               |
| Human SIP1                           | A/B                     | 53                         | 234               |
| Human GAPDH                          | A/B                     | 53                         | 142               |
| Mouse GAPDH                          | C/D                     | 53                         | 256               |
| Human and mouse GAPDH                | E/F                     | 53                         | 446               |

<sup>a</sup>The primer set is a primer identifier pair (see Table S1 for individual primer identifiers) used to amplify the target gene of interest.

**Table S3.** Gene accession numbers associated with Oncomine microarray data sets

| Gene    | Accession no. | Breast 1 | Breast 2 | Adrenal | Brain | Endocrine | Gastric | Lung | Ovarian | Renal | Salivary | Sarcoma 1 | Sarcoma 2 |
|---------|---------------|----------|----------|---------|-------|-----------|---------|------|---------|-------|----------|-----------|-----------|
| Jagged1 | NM_000214     | X        |          |         |       |           |         |      |         |       |          |           |           |
| Jagged1 | AA933616      |          | X        |         |       |           |         |      |         |       |          |           |           |
| Jagged1 | R70684        |          | X        |         |       |           | X       | X    | X       | X     |          | X         |           |
| Jagged1 | U77914        |          |          | X       | X     | X         |         |      |         |       | X        |           | X         |
| Jagged1 | AI378220      |          |          | X       |       |           |         |      |         |       | X        |           |           |
| Jagged1 | U73936        |          |          |         | X     |           |         |      |         |       |          |           |           |
| Jagged1 | U61276        |          |          |         | X     |           |         |      |         |       |          |           |           |
| Jagged1 | AI457817      |          |          |         | X     |           |         |      |         |       |          |           |           |
| Jagged1 | T96855        |          |          |         |       |           |         | X    |         |       |          |           |           |
| Slug    | AI572079      | X        |          |         |       |           |         |      |         |       |          |           |           |
| Slug    | H57309        |          | X        |         |       |           | X       | X    | X       | X     |          | X         |           |
| Slug    | N91754        |          | X        |         |       |           | X       | X    | X       | X     |          | X         |           |
| Slug    | U69196        |          |          | X       |       | X         |         |      |         |       | X        |           | X         |
| Slug    | NM_003068     |          |          |         | X     |           |         |      |         |       |          |           |           |
| Snail   | NM_005985     | X        |          |         |       |           |         |      |         |       |          |           |           |
| Snail   | AA465052      |          |          |         |       |           |         | X    | X       | X     |          |           |           |
| Notch1  | NM_017617     | X        |          |         |       |           |         |      |         |       |          |           |           |
| Notch1  | AA903201      |          | X        |         |       |           |         |      |         |       |          |           |           |
| Notch1  | H18865        |          | X        |         |       |           |         |      |         |       |          |           |           |
| HEY1    | NM_012258     | X        |          |         |       |           |         |      |         |       |          |           |           |
| HEY1    | R61374        |          | X        |         |       |           |         |      |         |       |          |           |           |
| HEY2    | NM_012259     | X        |          |         |       |           |         |      |         |       |          |           |           |
| HEY2    | AI299482      |          | X        |         |       |           |         |      |         |       |          |           |           |
| HEYL    | AL040198      | X        |          |         |       |           |         |      |         |       |          |           |           |
| HEYL    | AA969508      |          | X        |         |       |           |         |      |         |       |          |           |           |
| HEYL    | R27319        |          | X        |         |       |           |         |      |         |       |          |           |           |

X indicates accession numbers associated with the particular data set.
